# Supplementary material for: Seasonal Variations of Faecal Cortisol Metabolites in Koalas in South East Queensland
Source: MDPI journal article supplement (doi:10.3390/ani11061622), 2021-05-31
Supplement: s1 [file s1]

# Seasonal variations of faecal cortisol metabolites in koalas in South-East Queensland

## Supplementary Information

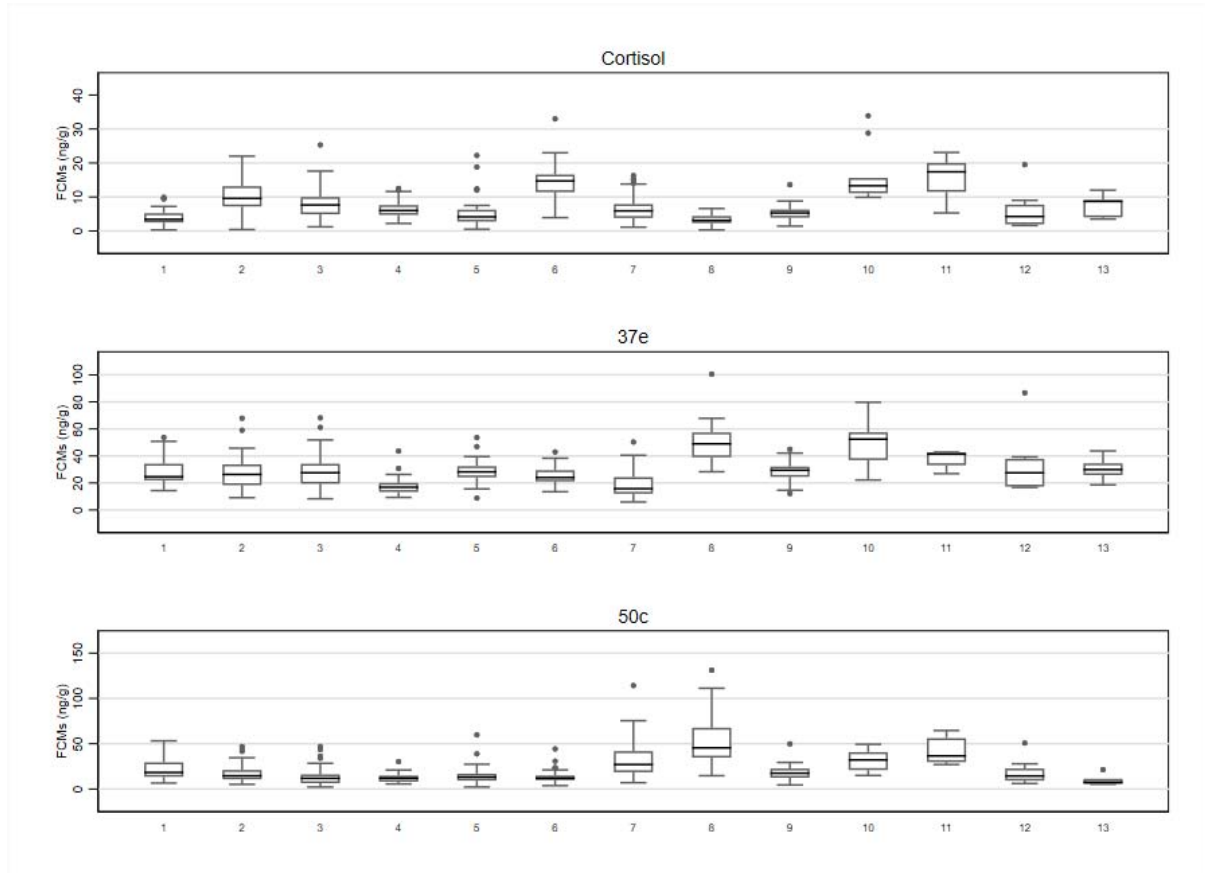

Figure S1: Box and whisker plots of 13 koalas sampled for FCM levels (ng/g) using three EIAs (Cortisol, 37e, 50c). Koalas 1, 2, 3 & 7 were sampled 46 times, 8 & 9 were sampled 40 times, 5 & 6 were sampled 38 times, 4 was sampled 34 times, 10 was sampled 12 times, 12 & 13 were sampled 8 times and 11 was sampled 6 times.

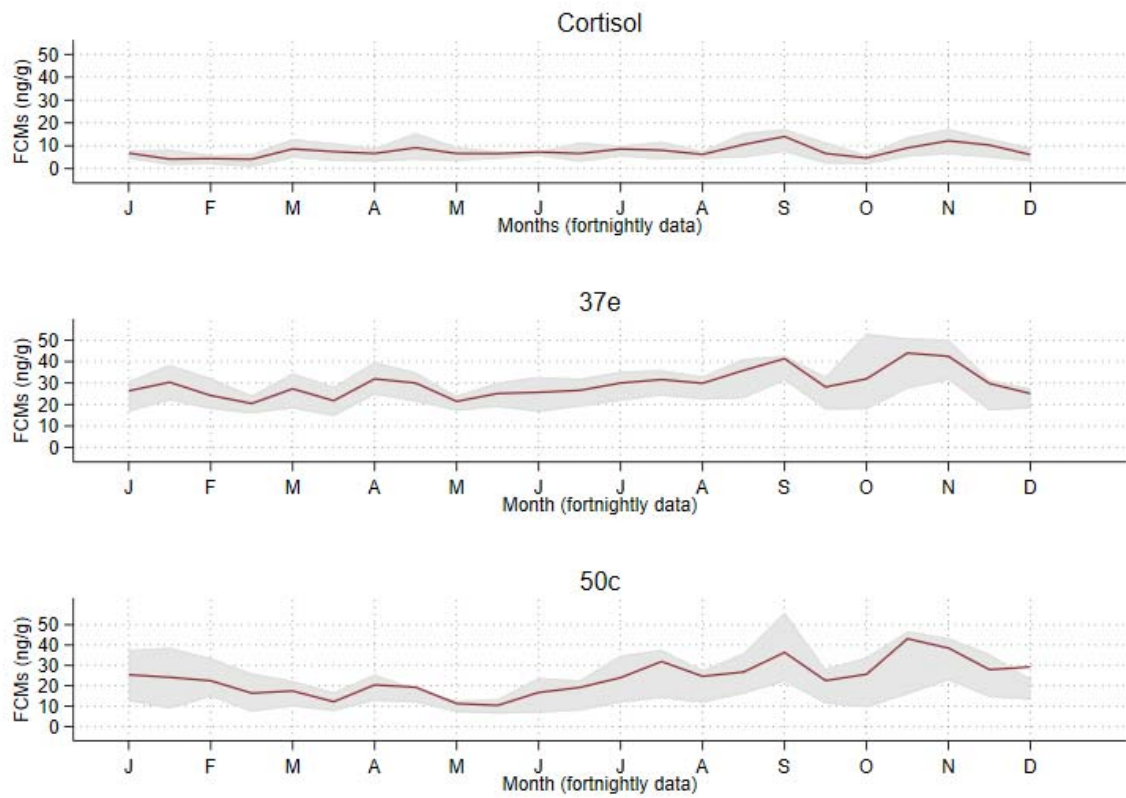

Figure S2: Fortnightly mean (red line) and 95% percentile (shaded area) FCM values (ng/g) measured with the cortisol, 37e and 50c EIA.

Table S1: Results of mixed effect linear regression models (with koala ID as random effect) to explore the association between log-transformed FCM values for the cortisol, 37e, and 50c EIA, respectively and predictors (month, breeding season, time of day, sex, age category. Please note due to collinearity with breeding season, month was not used in the multivariable model).

| Variable               | Subgroups              | Cortisol EIA (logFCM) |         |                   | 37e EIA (logFCM)    |         |                   | Univariate analysis<br>50c EIA (logFCM) |         |                   | Multivariable analysis<br>50c EIA (logFCM) |         |
|------------------------|------------------------|-----------------------|---------|-------------------|---------------------|---------|-------------------|-----------------------------------------|---------|-------------------|--------------------------------------------|---------|
|                        |                        | Coefficient           | p-value | Wald test p-value | Coefficient         | p-value | Wald test p-value | Coefficient                             | p-value | Wald test p-value | Coefficient                                | p-value |
|                        |                        |                       |         |                   |                     |         |                   |                                         |         |                   |                                            |         |
| <i>Month</i>           | Jan                    | 0                     |         | <0.001            | 0                   |         | <0.001            | 0                                       |         | <0.001            |                                            |         |
|                        | Feb                    | -0.23 (-0.52, 0.05)   | 0.108   |                   | -0.16 (-0.36, 0.03) | 0.101   |                   | -0.27 (-0.60, 0.06)                     | 0.114   |                   |                                            |         |
|                        | Mar                    | 0.37 (0.11, 0.64)     | 0.006   |                   | -0.01 (-0.19, 0.17) | 0.921   |                   | -0.26 (-0.57, 0.05)                     | 0.099   |                   |                                            |         |
|                        | Apr                    | 0.41 (0.14, 0.69)     | 0.003   |                   | -0.07 (-0.26, 0.12) | 0.477   |                   | -0.43 (-0.75, -0.11)                    | 0.009   |                   |                                            |         |
|                        | May                    | 0.37 (0.10, 0.64)     | 0.008   |                   | -0.07 (-0.26, 0.11) | 0.439   |                   | -0.64 (-0.96, -0.32)                    | <0.001  |                   |                                            |         |
|                        | Jun                    | 0.19 (-0.14, 0.53)    | 0.254   |                   | -0.05 (-0.27, 0.18) | 0.697   |                   | -0.33 (-0.72, 0.07)                     | 0.103   |                   |                                            |         |
|                        | Jul                    | 0.55 (0.21, 0.90)     | 0.002   |                   | 0.12 (-0.11, 0.35)  | 0.314   |                   | 0.03 (-0.37, 0.43)                      | 0.888   |                   |                                            |         |
|                        | Aug                    | 0.37 (0.09, 0.65)     | 0.010   |                   | 0.12 (-0.11, 0.32)  | 0.203   |                   | 0.12 (-0.21, 0.45)                      | 0.479   |                   |                                            |         |
|                        | Sep                    | 0.67 (0.35, 0.99)     | <0.001  |                   | 0.37 (0.17, 0.57)   | <0.001  |                   | 0.32 (-0.02, 0.65)                      | 0.062   |                   |                                            |         |
|                        | Oct                    | -0.17 (-0.48, 0.14)   | 0.294   |                   | 0.04 (-0.16, 0.24)  | 0.694   |                   | -0.03 (-0.36, 0.30)                     | 0.857   |                   |                                            |         |
|                        | Nov                    | 0.68 (0.37, 0.98)     | <0.001  |                   | 0.45 (0.25, 0.66)   | <0.001  |                   | 0.48 (0.13, 0.84)                       | 0.007   |                   |                                            |         |
|                        | Dec                    | 0.35 (0.08, 0.62)     | 0.012   |                   | -0.01 (-0.19, 0.18) | 0.953   |                   | 0.09 (-0.23, 0.41)                      | 0.569   |                   |                                            |         |
| <i>Breeding season</i> | Feb-Aug (non-breeding) | 0.00                  |         |                   | 0                   |         |                   | 0                                       |         |                   | 0                                          |         |
|                        | Sep-Jan (breeding)     | -0.01 (-0.15, 0.13)   | 0.896   |                   | 0.14 (0.22, 3.32)   | 0.001   |                   | 0.45 (0.33, 0.57)                       | <0.001  |                   | 0.47 (0.35, 0.59)                          | <0.001  |
| <i>Time of day</i>     | Morning                | 0                     |         |                   | 0                   |         |                   | 0                                       |         |                   | 0                                          |         |
|                        | Evening                | 0.13 (-0.01, 0.26)    | 0.062   |                   | 0.02 (-0.06, 0.10)  | 0.618   |                   | 0.13 (0.01, 0.24)                       | 0.036   |                   | 0.17 (0.06, 0.28)                          | 0.003   |
| <i>Sex</i>             | Male                   | 0                     |         |                   | 0                   |         |                   | 0                                       |         |                   | 0                                          |         |
|                        | Female                 | 0.33 (-0.29, 0.94)    | 0.299   |                   | -0.05 (-0.42, 0.31) | 0.772   |                   | -0.59 (-1.10, -0.09)                    | 0.022   |                   | -0.62(-1.15, -0.10)                        | 0.019   |
| <i>Age category</i>    | up to 2 years          | 0.00                  |         |                   | 0                   |         | 0.939             | 0                                       |         | 0.559             |                                            |         |
|                        | >2 years to 5 years    | 0.03 (-0.69, 0.75)    |         |                   | -0.05 (-0.46, 0.36) | 0.818   |                   | 0.26 (-0.40, 0.92)                      | 0.439   |                   |                                            |         |
|                        | > 5 years              | -0.01 (-0.99, 0.96)   | 0.995   |                   | -0.10 (-0.65, 0.46) | 0.734   |                   | -0.17 (-1.07, 0.73)                     | 0.708   |                   |                                            |         |
